# Supplementary material
Source: PubMed Central journal article supplement (PMC8275774)
Supplement: 12264_2021_662_MOESM1_ESM.pdf [file 12264_2021_662_MOESM1_ESM.pdf]

## Supplementary Materials

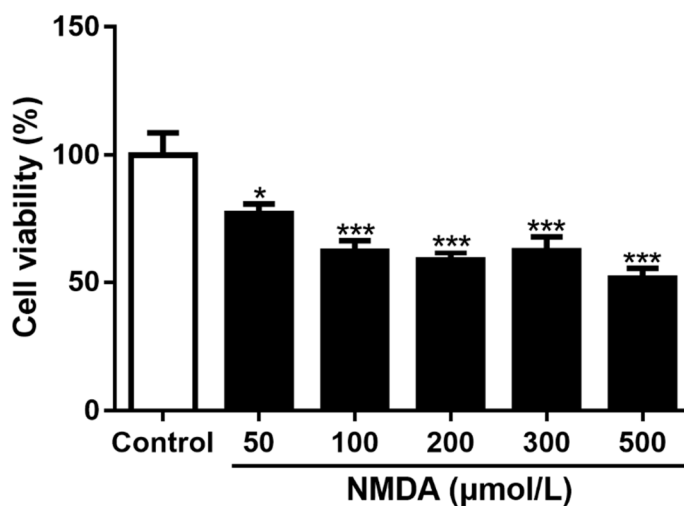

**Fig. S1** NMDA-induced cytotoxicity. Cell viability was evaluated after exposure to different concentrations of NMDA (50 µmol/L, 100 µmol/L, 200 µmol/L, 300 µmol/L, or 500 µmol/L) for 24 h using the MTT assay. \* $P < 0.05$ , \*\*\* $P < 0.001$  vs control group. Data are expressed as the mean  $\pm$  SD,  $n = 8$ . Statistical significance was calculated using one-way ANOVA and Dunnett's multiple comparison test.

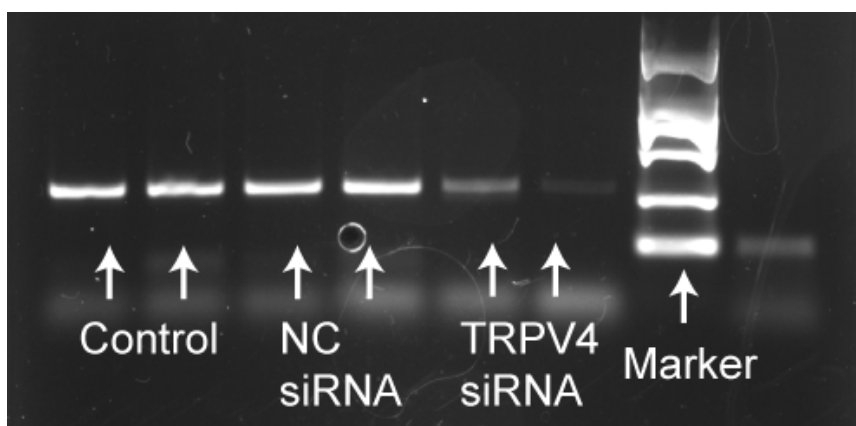

**Fig. S2** The mRNA expression level of TRPV4 after siRNA (10 nmol/L) silencing.

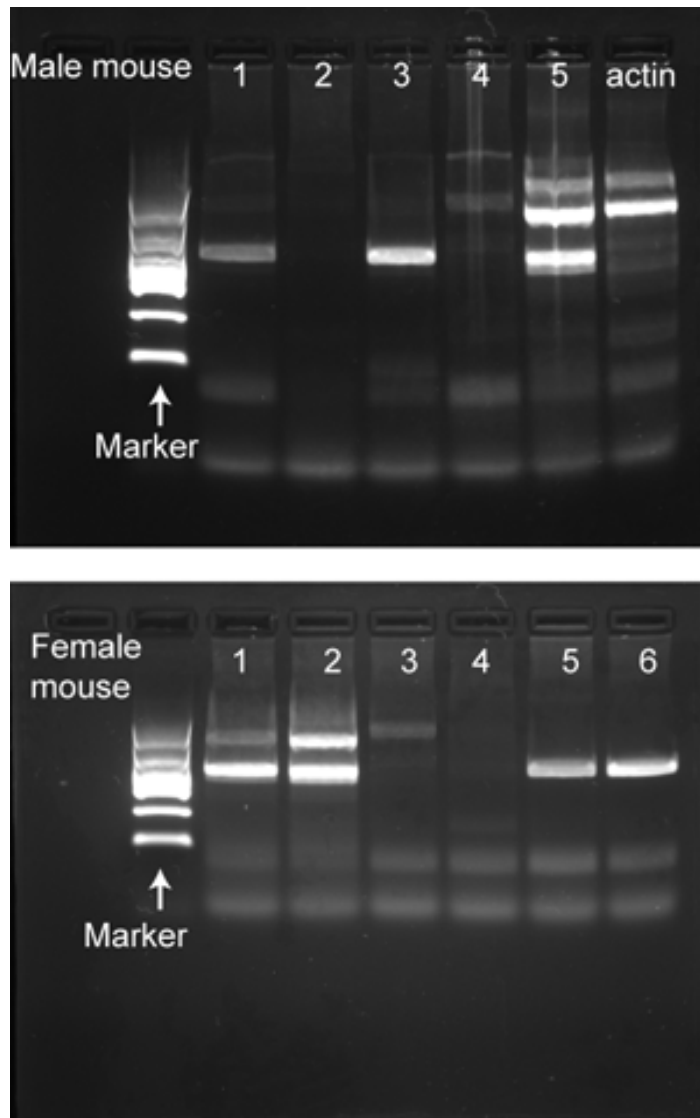

**Fig. S3** TRPV4 mRNA expression level of TRPV4-KO F2 progenies. F2 mice were bred in-house from heterozygous breeding pairs (F1). Male mouse No. 2 and female mouse No. 4 were selected to breed the F3 progeny.
